# Supplementary material for: Methoxy poly(ethylene glycol)-block-polycaprolactone copolymer: formulation and optimization by experimental design; determination of diblock molar mass by multivariate regression analysis of 1H NMR spectra
Source: Royal Society of Chemistry journal article supplement (doi:10.1039/c3ay26561g), 2013-01-01
Supplement: c3ay26561g.pdf [file c3ay26561g.pdf]

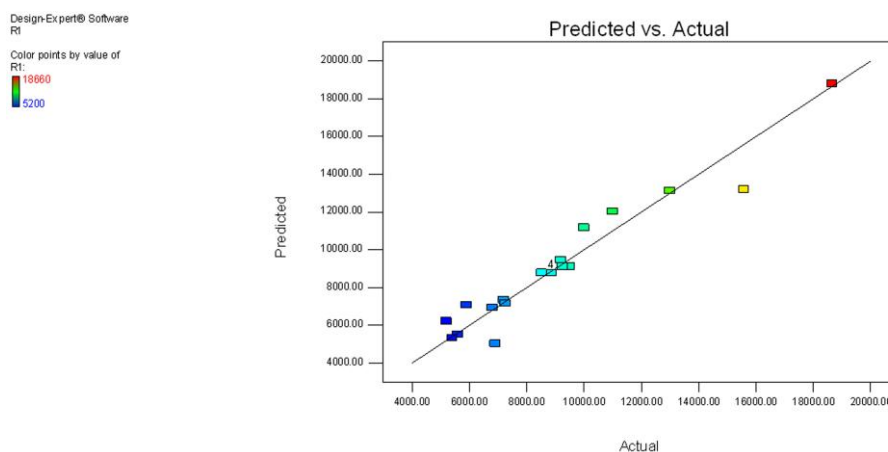

Fig. A: the actual versus predicted values for the  $Y_1$

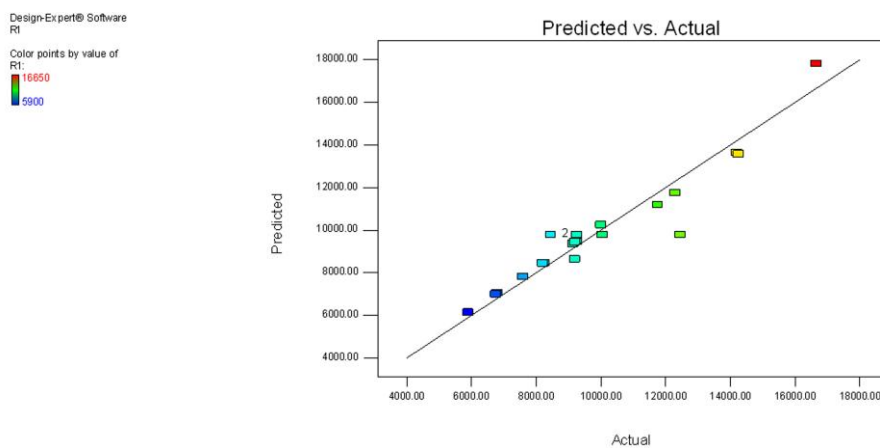

Fig. B: relation between actual and predicted values (Parity plot) for  $Y_2$

Table A: Effective factors and factor levels for Synthesis of MePEC.

| Factors               | unit               | Levels |      |        |      |         |
|-----------------------|--------------------|--------|------|--------|------|---------|
|                       |                    | Lowest | low  | Center | high | Highest |
|                       |                    | -1.62  | -1   | 0      | 1    | 1.62    |
| A)Time                | hour               | 1.95   | 4    | 7      | 10   | 12.05   |
| B) Temperature        | $^{\circ}\text{C}$ | 109.66 | 125  | 147.50 | 170  | 185.34  |
| C)MePEG/Cl ratio      | % wt               | 24.77  | 35   | 50     | 65   | 75.23   |
| D) amount of Sn(OCT)2 | mg                 | 0.16   | 0.25 | 0.38   | 0.50 | 0.59    |

The estimated quadratic model in terms of coded factors (for GPC) is:

$$Y_1 = + 9121.95 + 1218.94 * X_1 + 1724.35 * X_2 - 2427.32 * X_3 - 200.38 * X_4 + 632.12 * X_1 * X_2 - 532.50 * X_1 * X_3 - 1120.65 * X_1 * X_4 - 1570.00 * X_2 * X_3 + 236.44 * X_2 * X_4 + 482.50 * X_3 * X_4 \quad (\text{eq. 1})$$

and in terms of actual factors (for GPC) is:

$$Y_1 = -23483.71373 + 737.33258 * \text{Time} + 212.15237 * \text{Temperature} + 510.66016 * \text{MePEG/Cl} - 5950.74624 * \text{Sn(Oct)}_2 + 9.36472 * \text{Time} * \text{Temperature} - 11.83333 * \text{Time} * \text{MePEG/Cl} - 2988.39916 * \text{Time} * \text{Sn(Oct)}_2 - 4.65185 * \text{Temperature} * \text{PEG/Cl} + 84.06659 * \text{Temperature} * \text{Sn(Oct)}_2 + 257.33333 * \text{PEG/Cl} * \text{Sn(Oct)}_2$$

The estimated quadratic model in terms of coded factors (for NMR) is:

$$Y_2 = + 9775.71 + 951.37 * X_1 + 431.09 * X_2 - 1262.10 * X_3 - 981.10 * X_4 - 356.10 * X_1 * X_2 - 237.50 * X_1 * X_3 + 418.59 * X_1 * X_4 + 175.00 * X_2 * X_3 + 76.37 * X_2 * X_4 + 762.50 * X_3 * X_4 - 400.16 * X_1^2 - 727.20 * X_2^2 + 2092.39 * X_3^2 - 700.68 * X_4^2 \quad (\text{eq. 2})$$

final equation in terms of actual factors (for NMR):

$$Y_2 = + 3979.27570 + 1563.03506 * \text{Time} + 443.73118 * \text{Temperature} - 1206.12719 * \text{PEG/Cl} - 367.86891 * \text{Sn(OCT)}_2 - 5.27549 * \text{Time} * \text{Temperature} - 5.27778 * \text{Time} * \text{PEG/Cl} + 1116.23354 * \text{Time} * \text{Sn(OCT)}_2 + 0.51852 * \text{Temperature} * \text{PEG/Cl} + 27.15225 * \text{Temperature} * \text{Sn(OCT)}_2 + 406.66667 * \text{PEG/Cl} * \text{Sn(OCT)}_2 - 44.46260 * \text{Time}^2 - 1.43645 * \text{Temperature}^2 + 9.29950 * \text{PEG/Cl}^2 - 44843.76331 * \text{Sn(OCT)}_2^2$$

**Table B:** Results of calibration and validation of the PLS models on the raw spectra and spectra with various pretreatments.

| Pretreatment process     | PLS factors | Calibration    |                    | Cross-validation |                     | SD        |
|--------------------------|-------------|----------------|--------------------|------------------|---------------------|-----------|
|                          |             | R <sup>2</sup> | RMSEC <sup>a</sup> | R <sup>2</sup>   | RMSECV <sup>b</sup> |           |
| Raw spectra              | 8           | 0.1352         | 37.7300            | 0.1352           | 37.7780             | 1190.2879 |
| Mean centering           | 8           | 0.14943        | 34.3589            | 0.14939          | 34.2584             | 1070.2888 |
| Auto scaling             | 7           | 0.25236        | 1.3258             | 0.25936          | 1.3324              | 503.3395  |
| Auto net analysis signal | 3           | 0.88373        | 0.3248             | 0.84445          | 0.5625              | 49.2371   |

<sup>a</sup>Root-mean-square error of calibration.

<sup>b</sup>Root-mean-square error of cross-validation.

Design-Expert® Software  
R1

Color points by value of  
R1:  
18650  
5900

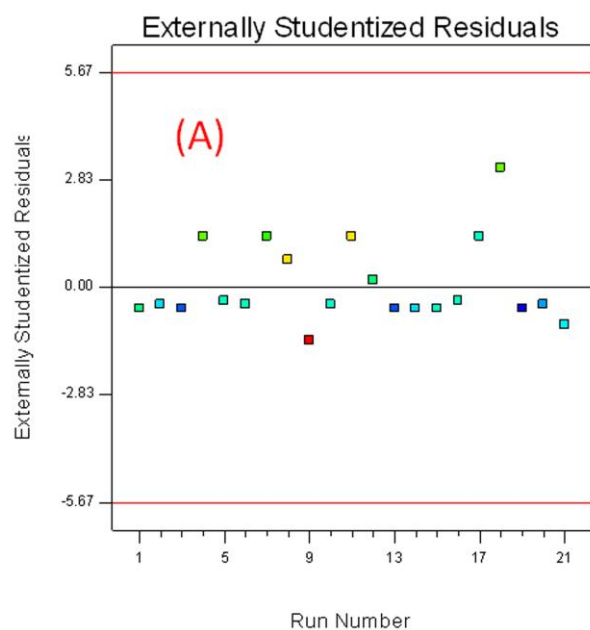

Design-Expert® Software  
R1

Color points by value of  
R1:  
18660  
5200

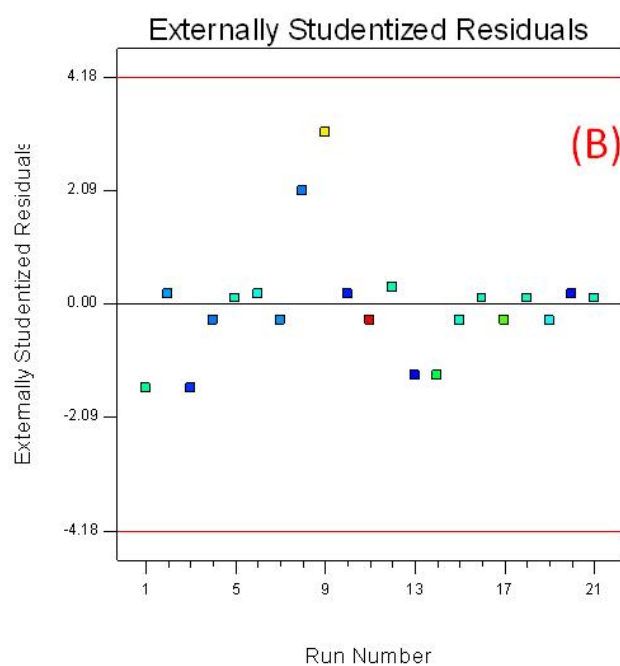

Fig. C: The externally studentized residuals plot determined for A)  $Y_1$  response, B)  $Y_2$  response.

Design-Expert® Software  
R1

Color points by value of  
R1:  
18660  
5200

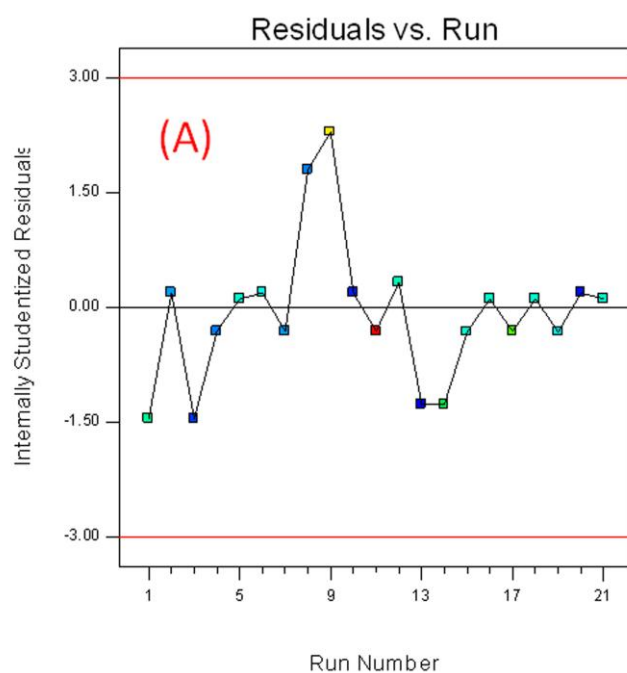

Design-Expert® Software  
R1

Color points by value of  
R1:  
16650  
5900

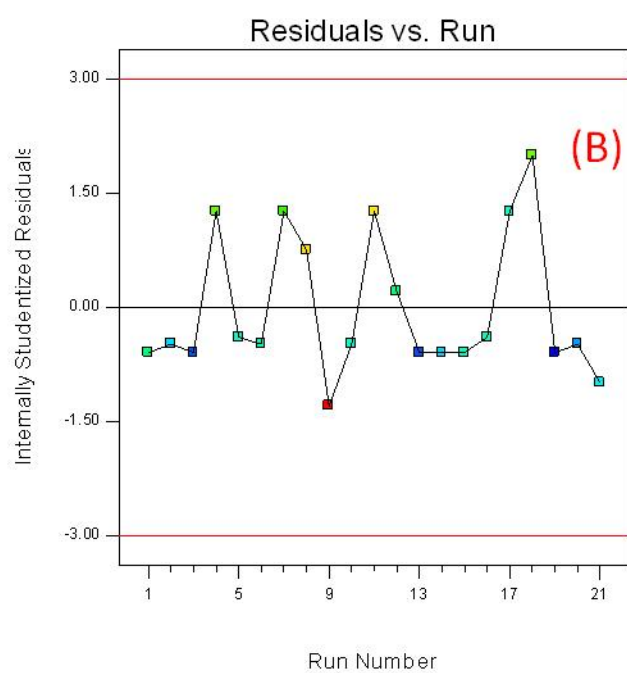

Fig. D: The internally studentized residuals plot determined for A)  $Y_1$  response, B)  $Y_2$  response.
